# Supplementary material
Source: publisher figshare collection journal article supplement (https://acs.figshare.com/ndownloader/files/4528882)
Supplement: Supplementary file 1 [file 4528882]

## Supporting information

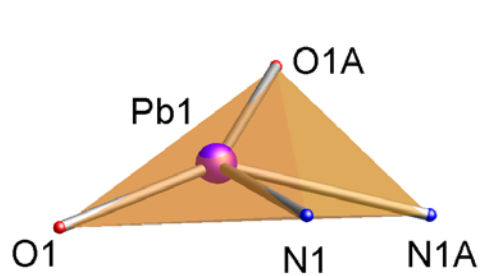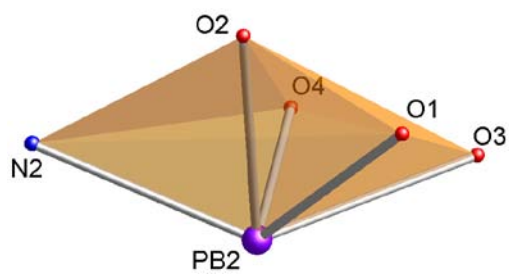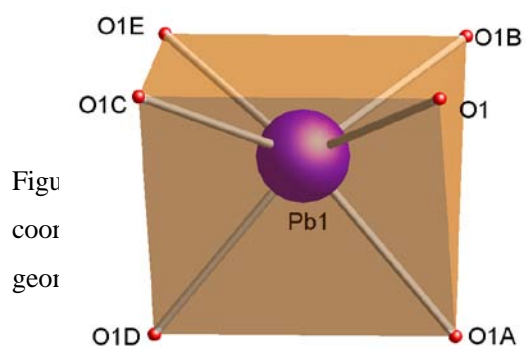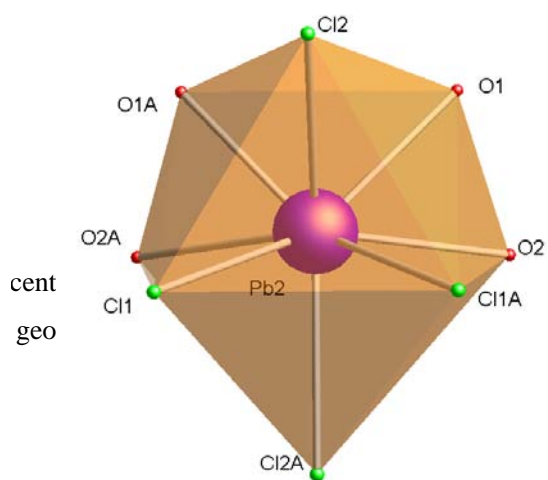

while in **2** six-  
coordinate

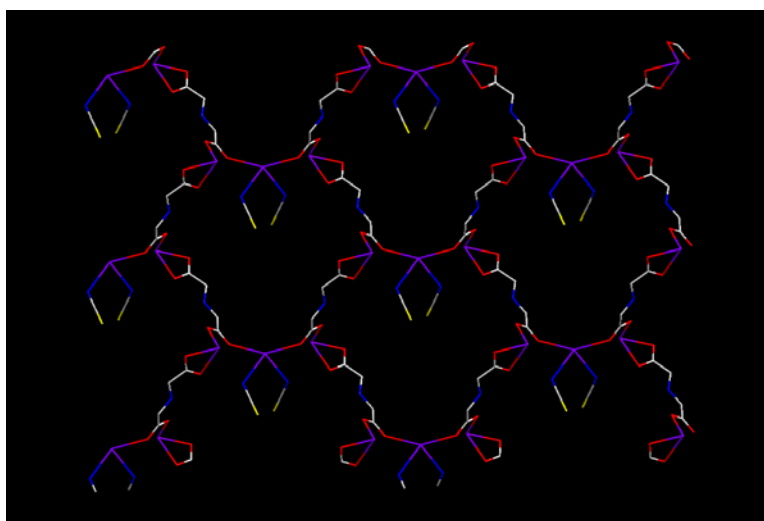

( a )

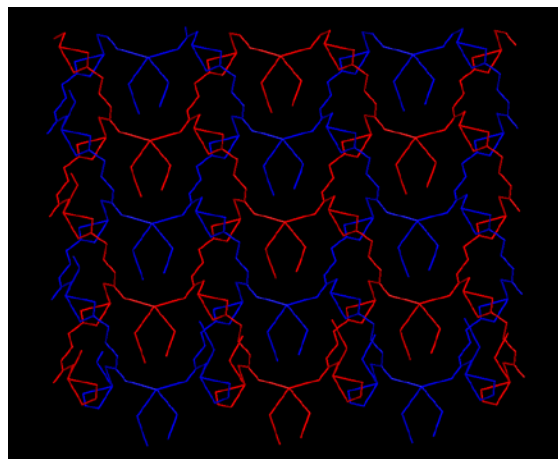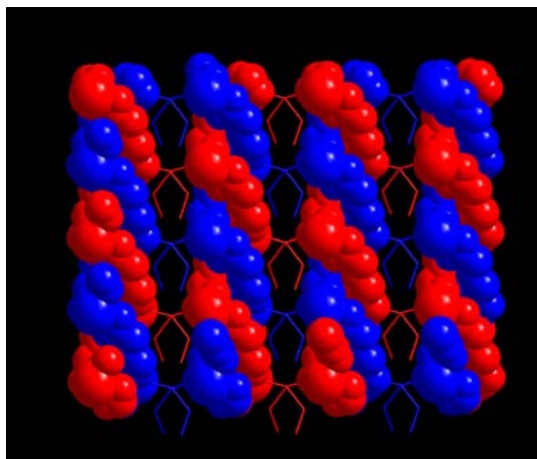

Figure S2 (a) Infinite  $\{Pb[IDA]_2\}_n$  helical chains are linked by  $Pb(NCS)_2$  structural units forming 2D layers with large cavities; (b) The stick and spacing-filling modes of 2D homo-chiral interpenetrating layers containing double-stranded left-handed helices.

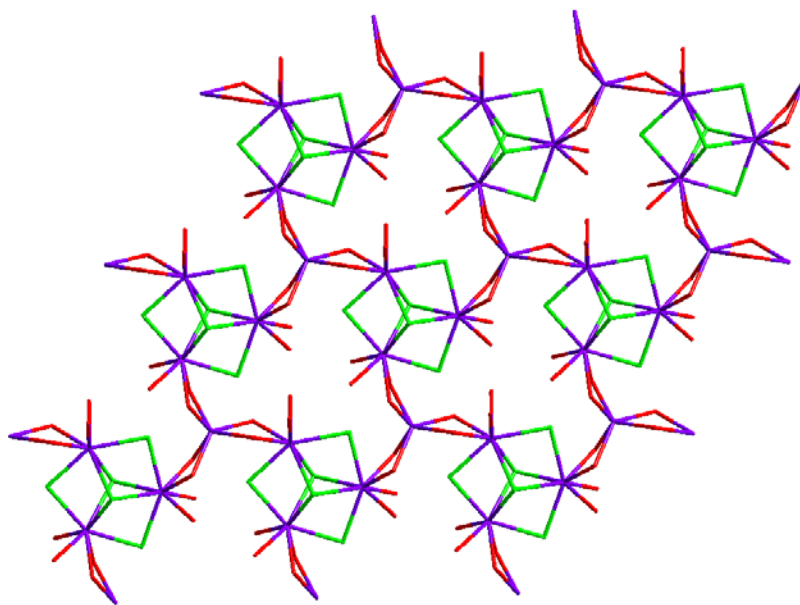

Figure S3 2D inorganic-organic hybrid layers containing  $\text{Pb}_4\text{O}_6$  cores with  $\Lambda$  geometries.

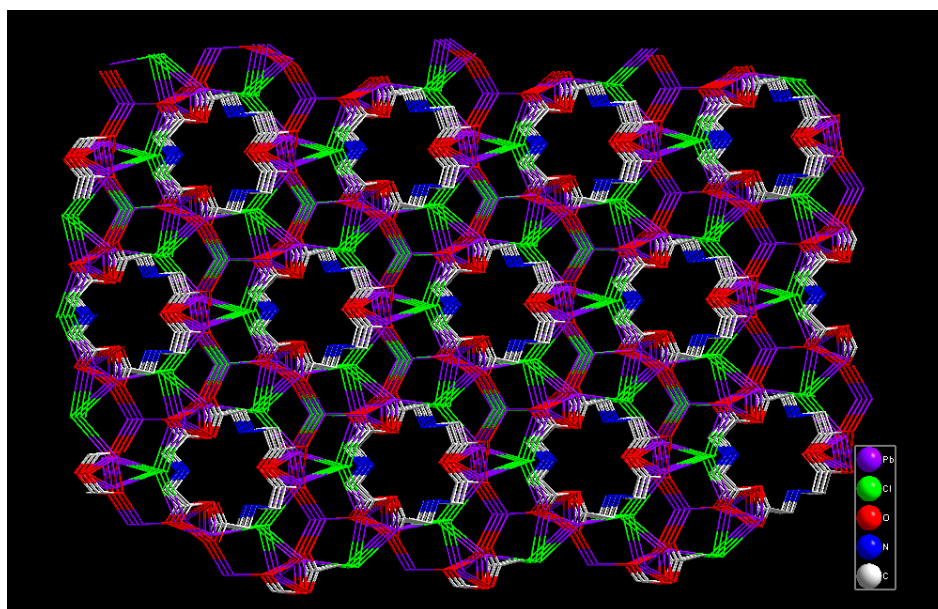

Figure S4 The 3D  $\text{Pb}^{\text{II}}$  framework of **2**.
